**TITLE:** END-TIDAL PCO<sub>2</sub> REFLECTS CHANGES OF CARDIAC OUTPUT  
**AUTHORS:** K. Shibutani, M.D., T. Komatsu, M.D., N. Kashiwagi, M.D., M. Bairamian, M.D. V. Kumar, M.D.  
**AFFILIATION:** Anes. Dept., New York Medical College, Valhalla, NY 10595

End-tidal CO<sub>2</sub> (PetCO<sub>2</sub>) tension often decreases during hypotension or hemorrhage and increases during surgical stimulation or blood transfusion. In this study, we examined the possible mechanisms of PetCO<sub>2</sub> changes during blood withdrawal both in human and in dogs.

In human studies (Table 1), ventilation was maintained constant and PetCO<sub>2</sub> was monitored by Nellcor 1000 when 1000 ml of blood were harvested prior to cardio-pulmonary bypass in 10 patients undergoing coronary artery bypass graft surgery. In animal studies (n=10), blood was withdrawn in two stages (Stage I and Stage II) to produce progressive decrease of oxygen delivery (DO<sub>2</sub>) as described in Table 2.

During blood withdrawal, both in human and dog studies, PetCO<sub>2</sub> and cardiac output (CO) decreased significantly (P<0.05), while mixed venous pH (pHv) and PCO<sub>2</sub> (PvCO<sub>2</sub>) were unchanged. Arterial PCO<sub>2</sub> (PaCO<sub>2</sub>) decreased insignificantly in human studies but significantly decreased in dog studies at Stage I. Increases of arterial end-tidal PCO<sub>2</sub> difference (a-ePCO<sub>2</sub>) were insignificant.

During transient changes of CO, content of CO<sub>2</sub>

in mixed venous blood apparently did not change. Therefore, total amount of CO<sub>2</sub> returning to the heart depends primarily on CO<sub>2</sub>. The cause of decreases of PetCO<sub>2</sub> during transient decrease of CO may be attributable to decreases of total amount of CO<sub>2</sub> return rather than due to ventilation perfusion abnormalities. PetCO<sub>2</sub> monitoring can be a useful noninvasive method to assess changes of CO in the clinical states, where ventilation is maintained constant.

Table 1. Human Studies

|                            | Prior to blood withdrawal | Following blood withdrawal |
|----------------------------|---------------------------|----------------------------|
| PetCO <sub>2</sub> : mmHg  | 26.0 ± 2.7                | 24 ± 1.8*                  |
| CO : l                     | 3.7 ± 0.9                 | 2.7 ± 0.5*                 |
| pH <sub>a</sub>            | 7.46 ± 0.05               | 7.50 ± 0.09                |
| PaCO <sub>2</sub> : mmHg   | 32.5 ± 3.8                | 31.5 ± 2.4                 |
| pH <sub>v</sub>            | 44 ± 0.04                 | 7.43 ± 0.04                |
| PvCO <sub>2</sub> : mmHg   | 37.4 ± 9.4                | 37.1 ± 3.6                 |
| Δ pH                       | 4.1 ± 1.3                 | 6.3 ± 1.3*                 |
| Δ PCO <sub>2</sub> : mmHg  | 6.6 ± 1.5                 | 7.2 ± 1.7                  |
| a-ePCO <sub>2</sub> : mmHg | 5.1 ± 3.7                 | 6.6 ± 2.8                  |

Table 2. Dog Studies

|                             | C         | Stage I    | Stage II   |
|-----------------------------|-----------|------------|------------|
| VECO <sub>2</sub> : ml/min  | 127±22    | 106±23*    | 92±33*     |
| CO : l                      | 3.3±0.2   | 1.5±0.5*   | 0.99±0.38* |
| DO <sub>2</sub> : ml/min.kg | 29±7      | 15.4±6*    | 9.6±3.8*   |
| pH <sub>a</sub>             | 7.32±0.08 | 7.33±0.08  | 7.25±.11   |
| PaCO <sub>2</sub> : mmHg    | 44±7.1    | 38.5± 5.4  | 40±8.1     |
| pH <sub>v</sub>             | 7.29±.09  | 7.25±.11*  | 6.81±.48*  |
| PvCO <sub>2</sub> : mmHg    | 50±9      | 52±11      | 62±14*     |
| Δ pH                        | 0.03±0.02 | 0.08±0.04* | 0.09±0.03* |
| Δ PCO <sub>2</sub> : mmHg   | -5.9±4.7  | -14±9.0*   | -22±11*    |

\*P<0.05 as compared to C

A507

**TITLE:** CO-Hb IN 1000 SMOKERS AND NONSMOKERS, THE BIOLOGICAL HALF LIFE OF COHb, AND CONSEQUENCES ON PULSOXIMETRY  
**AUTHORS:** A. DELLER, M.D., K. FORSTNER, R. STENZ, M.N. SCHREIBER, M.D., T. FÜGEL, M.D.  
**AFFILIATION:** UNIVERSITÄTSKLINIK FÜR ANÄSTHESIOLOGIE, POSTFACH 3880, D-7900 ULM, W. GERMANY

Pulse oximetry currently in use determines the oxygen saturation of hemoglobin (S<sub>2</sub>O<sub>2</sub>) on the basis of BEER'S law using light of only two wavelengths: 660 and 940 nm. Thus, in the presence of carboxyhemoglobin (COHb) or methemoglobin (MetHb) in human blood the fractional hemoglobin saturation

(1)  $S_{2,frac} = O_2Hb : (O_2Hb + Hb + COHb + MetHb) \times 100\%$  cannot be exactly determined - four wavelengths would be required for analysis of  $S_{2,frac}$ .

We investigated in the present study with informed consent and approval of the local research committee in which patients COHb and MetHb might complicate the interpretation of S<sub>2</sub>O<sub>2</sub> and impair oxygen transport. The endpoints were the following:

- A - distribution of COHb and MetHb in 1000 smoking (S) and nonsmoking (NS) out-patients,
- B - COHb1 before (at arrival in the hospital) and COHb2 after preoperative stop smoking > 10 h (at introduction of anaesthesia) in 50 heavy S, and the biological half life (t<sub>1/2</sub>) of COHb in
- C - 9 volunteer S overnight from two measurements, 1-after the last, and 2-before the first cigarette
- D - 13 volunteer S during moderate daily activity, calculated from 11 hourly measurements - first sample drawn after stop smoking (COHb-kinetics).

Heparinized samples of 200 µl (as a minimum) of venous blood were measured immediately after withdrawal by the in-vitro CO-oximeter Corning 2500 (Ciba-Corning). Differences were tested in parametric data by t-test and in nonparametric data by Wilcoxon test.

Significance (p<0.05) S vs NS \*, men (m) vs women (w) +. Mean (mn) and/or single values (sv) are presented.

|            | total | w    | m    | ns   | s     | w/ns | w/s   | m/ns | m/s   |
|------------|-------|------|------|------|-------|------|-------|------|-------|
| n          | 1000  | 381  | 619  | 630  | 370   | 288  | 93    | 342  | 277   |
| A COHb(mn) | 3.05  | 2.45 | 3.41 | 1.82 | 5.13* | 1.78 | 4.52* | 1.85 | 5.34* |
| MetHb(mn)  | 0.66  | 0.69 | 0.64 | 0.66 | 0.66  | 0.69 | 0.66  | 0.63 | 0.65  |

B n=50 (12w, 38m), COHb1(mn)=6.87±1.83, COHb2(mn)=3.77±1.11

|                              | w                  | m (sv) |      |      |      | w    | m (sv) |      |      |      |      |     |
|------------------------------|--------------------|--------|------|------|------|------|--------|------|------|------|------|-----|
| C n=9 (steep)t <sub>2</sub>  | (mn) <sup>+</sup>  | 1      | 2    | 3    | 4    | (mn) | 5      | 6    | 7    | 8    | 9    |     |
|                              |                    | 3.18   | 3.23 | 2.32 | 4.30 | 2.85 | 4.67   | 5.59 | 4.73 | 7.06 | 5.58 | 6.4 |
| D n=13 (awake)t <sub>2</sub> | w(mn) <sup>+</sup> | 1      | 2    | 3    | 4    | 5    | 6      | 7    |      |      |      |     |
|                              |                    | 2.61   | 3.20 | 2.65 | 2.18 | 2.35 | 2.72   | 2.71 | 2.44 |      |      |     |
|                              | m(mn)              | 8      | 9    | 10   | 11   | 12   | 13     |      |      |      |      |     |
|                              |                    | 3.69   | 3.39 | 4.18 | 4.02 | 3.69 | 3.38   | 3.46 |      |      |      |     |

We conclude from these data that  
 1. COHb in S (5.13±2.25), even when they stopped smoking (after 10 h: 3.77±1.11) may complicate the interpretation of S<sub>2</sub>O<sub>2</sub>, whereas COHb in NS (1.82±0.3) and MetHb (0.66±0.22) are constant. Thus, pulse oximetry by more than two wavelengths appears desirable.  
 2. As t<sub>1/2</sub> of COHb greatly varies, a more than 10 hour period of stop smoking preoperatively may be recommended. On behalf of the significantly shorter t<sub>1/2</sub> of COHb in women, women might be allowed to stop smoking closer before anaesthesia than men.

References: 1. Anesthesiology 70:98-108, 1989
